# Supplementary material for: Multi-color single-molecule tracking and subtrajectory analysis for quantification of spatiotemporal dynamics and kinetics upon T cell activation
Source: PubMed Central journal article supplement (PMC5539329; doi:10.1038/s41598-017-06960-z), 2017-08-01
Supplement: 41598_2017_6960_MOESM2_ESM.pdf [file 41598_2017_6960_MOESM2_ESM.pdf]

## Supplementary Information

### **Multi-color single-molecule tracking and subtrajectory analysis for quantification of spatiotemporal dynamics and kinetics upon T cell activation**

Yuma Ito<sup>1</sup>, Kumiko Sakata-Sogawa<sup>1,2,\*</sup>, Makio Tokunaga<sup>1,2,\*</sup>

<sup>1</sup>*School of Life Science and Technology, Tokyo Institute of Technology, Nagatsuta-cho, Midori, Yokohama 226-8501, Japan*

<sup>2</sup>*Center for Integrative Medical Sciences, RIKEN, Suehiro, Tsurumi, Yokohama 230-0045, Japan*

\*Correspondence and requests for materials should be addressed to M.T. (email: mtoku@bio.titech.ac.jp), and K.S. (email: ksogawa@hilo.bio.titech.ac.jp)

#### Supplementary information comprises:

Supplementary Movie Legends

Supplementary Results and Discussion

Supplementary Methods

Supplementary References

Supplementary Figures S1 and S2

Supplementary Tables S1–S5

## Supplementary Movie Legends

### Movie S1

Simultaneous three-color single-molecule imaging of CD3 $\zeta$ -EGFP (green), Qdot 655-labeled CD3 $\epsilon$  (red), and Qdot 585-labeled CD45 (blue) in living Jurkat cells at 37°C at a frame rate of 30 Hz.

## Supplementary Results and Discussion

### 1. Standard analysis using single-molecule tracking

#### 1.1 Ensemble-averaged mean square displacement

Single-molecule trajectories of CD3 $\epsilon$  and CD45 superimposed upon a binary average image of the TCR microclusters (CD3 $\zeta$ ) were used to quantify the dynamics (Fig. S1A and B). The overall diffusion coefficient  $D$  was obtained by calculating ensemble-averaged mean square displacements (MSD) as a function of time (Equation 1, Fig. S2). The ensemble-averaged MSD vs. time curves of CD3 $\epsilon$  and CD45 were nearly linear during the first 0.3–0.4 s, i.e., approximately ten frames within the margin of error. The diffusion coefficient  $D$  calculated from the slope of MSD (Equation 2) was  $0.0911 \pm 0.0006 \mu\text{m}^2/\text{s}$  for CD3 $\epsilon$  (95% confidence interval) and  $0.270 \pm 0.004 \mu\text{m}^2/\text{s}$  for CD45 (Table S1).

This result that the overall diffusion coefficient  $D$  of CD3 $\epsilon$  was three times smaller than that of CD45 does not correspond with the result using moving subtrajectory analysis (Fig. 5). In the case of heterogeneous movements, overall quantification should be used with caution.

#### 1.2 Two mobility states found inside the TCR microclusters by PDF analysis

Information on heterogeneous mobility was obtained by analysis using probability distribution functions (PDF; Fig. S1C–F). Curve fitting showed that a single-state diffusion model (Equation 3) was not sufficient to explain the PDFs of both CD3 $\epsilon$  and CD45. In contrast, a two-state diffusion model (Equation S1) provided better fits to the PDFs of both CD3 $\epsilon$  and CD45, yielding diffusion coefficients  $D_{\text{fast}}$  and  $D_{\text{slow}}$  for both the inside and outside the microclusters.

The three-state diffusion model<sup>1</sup> can improve goodness-of-fit. However, since the subtrajectory analysis showed that the diffusion coefficients were distributed in two peaks, the two-state diffusion model is judged to be appropriate for the present study.

The diffusion coefficients  $D_{\text{fast}}$  of the faster mobility state of CD3 $\epsilon$  and CD45 inside the microclusters were  $0.057 \pm 0.004 \mu\text{m}^2/\text{s}$  (relative occurrence 66%) and  $0.178 \pm 0.016 \mu\text{m}^2/\text{s}$  (77%), respectively (Table S1). It is noteworthy that the diffusion coefficients  $D_{\text{fast}}$  of both CD3 $\epsilon$  and CD45 inside the microclusters are similar to those outside the microclusters. Therefore the faster mobility state inside the microclusters is similar to the mobility state outside the

microclusters.

The diffusion coefficients  $D_{\text{slow}}$  of the slower mobility state inside the microclusters of CD3ε and CD45 were  $0.0041 \pm 0.0006$  (34%) and  $0.0091 \pm 0.0015 \mu\text{m}^2/\text{s}$  (23%), respectively (Table S1). They were 14 and 20 times smaller than  $D_{\text{fast}}$  of the faster mobility state, respectively. This result suggests that intermolecular interactions largely reduce the diffusion coefficients. In addition, the relative occurrence of the slower mobility against the faster mobility is larger on the inside of the microclusters compared with that on the outside. This suggests that the slower mobility state reflects molecular interactions with the microclusters.

## Supplementary Methods

### 1. Standard analysis methods

#### 1.1 Fitting analysis using probability distribution function

The histogram of displacements  $\Delta r = |\vec{r}_{i+1} - \vec{r}_i|$  during the frame interval  $\Delta t$  was obtained from all trajectories in a data set. Then, PDF( $\Delta r, \Delta t$ ) was calculated by dividing the histogram by  $N_{\text{total}}$ , where  $N_{\text{total}}$  is the total number of displacements  $\Delta r$  in all trajectories. PDF( $\Delta r, \Delta t$ ) was fitted by Equation 3 for the single-state diffusion model and by the following equation for the two-state diffusion model,

$$\text{PDF}_2(r, t) = \xi \frac{r}{2D_{\text{slow}}t} \exp\left(-\frac{r^2}{4D_{\text{slow}}t}\right) + (1 - \xi) \frac{r}{2D_{\text{fast}}t} \exp\left(-\frac{r^2}{4D_{\text{fast}}t}\right), \quad (\text{S1})$$

where  $\xi$  is a relative occurrence and  $D_{\text{slow}}$  and  $D_{\text{fast}}$  are the diffusion coefficients of the two states.

## Supplementary References

1. Gebhardt, J. C. *et al.* Single-molecule imaging of transcription factor binding to DNA in live mammalian cells. *Nat. Methods* **10**, 421-426 (2013).

Supplementary Figures

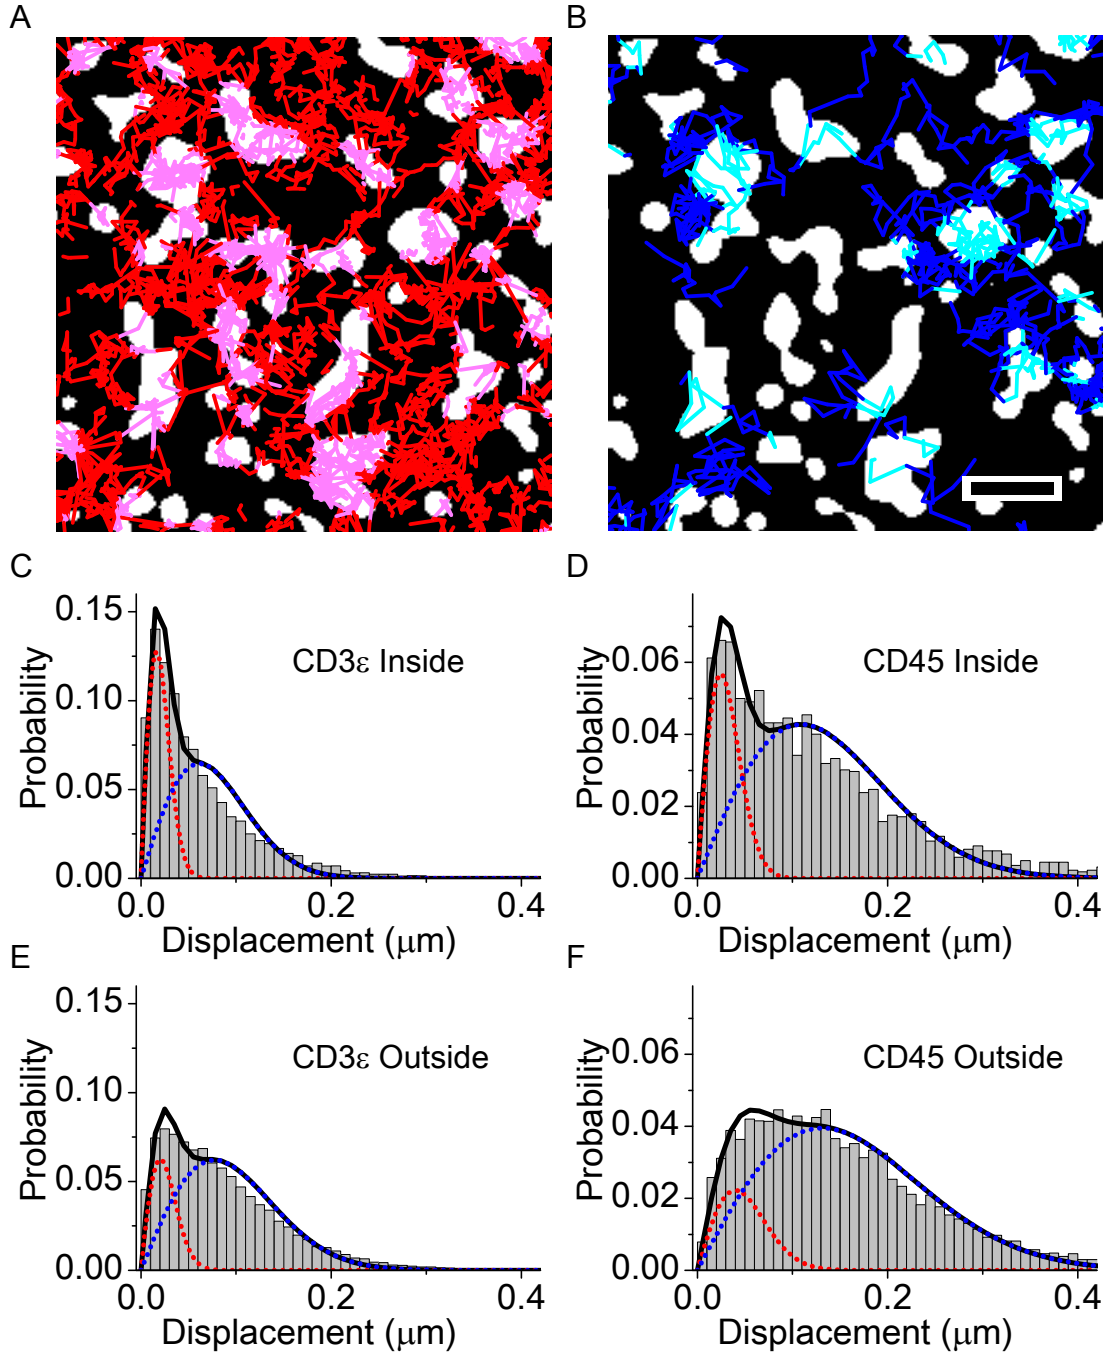

**Figure S1.** Two different mobility states of CD3ε and CD45 in the microclusters using probability distribution function (PDF) of standard single-molecule tracking analysis. (A, B) Trajectories of CD3ε (A) and CD45 (B) superimposed upon a binary average image of the TCR microclusters (CD3ζ) are shown in light colors for those inside the microclusters and in dark colors for those outside the microclusters. Bar, 1 μm. (C–F) The PDF of CD3ε (C, E) and CD45 (D, F) inside (C, D) and outside (E, F) the microclusters during  $\Delta t = 1$  frame (33.33 ms) is fitted with a two-state diffusion model PDF<sub>2</sub> (Equation S1) (solid line). The dotted lines represent the component PDFs of the slower states (red) and faster states (blue).

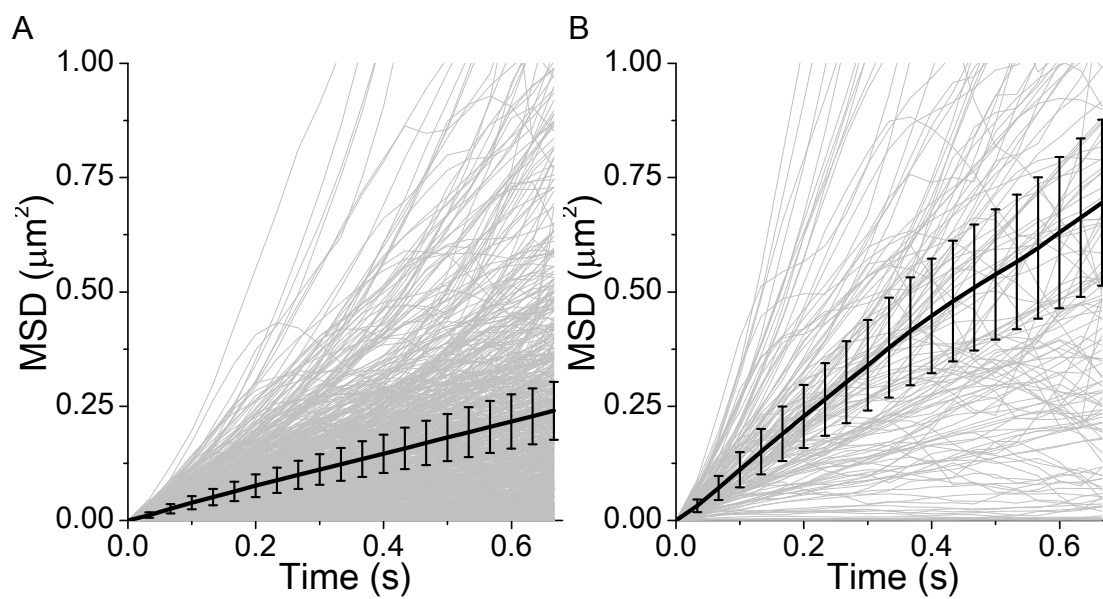

**Figure S2.** (A, B) Standard MSD analysis of single-molecule trajectories of CD3 $\epsilon$  (A) and CD45 (B) shown as a function of time. Black line: ensemble-averaged MSD curves with error bars representing standard errors of means; gray line: MSD curves of individual trajectories.

## Supplementary Tables

**Table S1.** Diffusion coefficients  $D$  obtained by standard single-molecule tracking analysis<sup>a</sup>

| MSD analysis (Equations 1 and 2)                               |         |                                                |                      |                                                |                        |                   |
|----------------------------------------------------------------|---------|------------------------------------------------|----------------------|------------------------------------------------|------------------------|-------------------|
|                                                                |         | $D$ ( $\mu\text{m}^2/\text{s}$ )               |                      | $N_{\text{traj}}$                              |                        |                   |
| CD3 $\epsilon$                                                 |         | 0.0911 ( $\pm$ 0.0006)                         |                      | 775                                            |                        |                   |
| CD45                                                           |         | 0.270 ( $\pm$ 0.004)                           |                      | 162                                            |                        |                   |
| PDF analysis using the two-state diffusion model (Equation S1) |         |                                                |                      |                                                |                        |                   |
|                                                                |         | Slow                                           |                      | Fast                                           |                        | $N_{\text{step}}$ |
|                                                                |         | $D_{\text{slow}}$ ( $\mu\text{m}^2/\text{s}$ ) | $\xi^{\text{a}}$ (%) | $D_{\text{fast}}$ ( $\mu\text{m}^2/\text{s}$ ) | $1-\xi^{\text{a}}$ (%) |                   |
| CD3 $\epsilon$                                                 | Outside | 0.0062 ( $\pm$ 0.0009)                         | 21 $\pm$ 2           | 0.090 ( $\pm$ 0.007)                           | 79 $\pm$ 2             | 37,536            |
|                                                                | Inside  | 0.0041 ( $\pm$ 0.0006)                         | 34 $\pm$ 3           | 0.057 ( $\pm$ 0.004)                           | 66 $\pm$ 3             | 14,738            |
| CD45                                                           | Outside | 0.0238 ( $\pm$ 0.0053)                         | 15 $\pm$ 2           | 0.258 ( $\pm$ 0.016)                           | 85 $\pm$ 2             | 9,801             |
|                                                                | Inside  | 0.0091 ( $\pm$ 0.0015)                         | 23 $\pm$ 2           | 0.178 ( $\pm$ 0.016)                           | 77 $\pm$ 2             | 2,222             |

Data, fitted value  $\pm$  95% confidence interval.  $N_{\text{traj}}$  indicates the number of trajectories, and  $N_{\text{step}}$  indicates the number of steps from two cells.

<sup>a</sup> The relative occurrences of the slower and faster diffusion states are  $\xi$  and  $1 - \xi$ , respectively.

**Table S2.** Lifetimes of trajectory durations and residence times obtained by moving subtrajectory analysis (Fig. 4)

| Lifetime of trajectory durations (Equation 10)                                             |                                 |                       |                                |                       |                   |
|--------------------------------------------------------------------------------------------|---------------------------------|-----------------------|--------------------------------|-----------------------|-------------------|
|                                                                                            | $\tau_{\text{traj\_short}}$ (s) | $\xi^a$ (%)           | $\tau_{\text{traj\_long}}$ (s) | $1-\xi^a$ (%)         | $N_{\text{traj}}$ |
| CD3 $\epsilon$                                                                             | 0.25 ( $\pm$ 0.01)              | 45 ( $\pm$ 2)         | 0.91 ( $\pm$ 0.02)             | 55 ( $\pm$ 2)         | 1,521             |
| CD45                                                                                       | 0.46 ( $\pm$ 0.01)              | 86 ( $\pm$ 2)         | 3.19 ( $\pm$ 0.57)             | 14 ( $\pm$ 2)         | 302               |
| Lifetime of residence times (Equation 11)                                                  |                                 |                       |                                |                       |                   |
|                                                                                            | CD3 $\epsilon$                  |                       | CD45                           |                       |                   |
|                                                                                            | $\tau$ (s)                      | $N_{\text{res\_}*}^b$ | $\tau$ (s)                     | $N_{\text{res\_}*}^b$ |                   |
| $\tau_{\text{res\_out}}$                                                                   | 1.92 ( $\pm$ 0.05)              | 1,131                 | 1.18 ( $\pm$ 0.04)             | 287                   |                   |
| $\tau_{\text{res\_bou}}$                                                                   | 0.54 ( $\pm$ 0.04)              | 962 <sup>c</sup>      | 0.68 ( $\pm$ 0.06)             | 245 <sup>c</sup>      |                   |
| $\tau_{\text{res\_bou}\rightarrow\text{out}}$                                              | 0.50 ( $\pm$ 0.03)              | 793                   | 0.64 ( $\pm$ 0.05)             | 245                   |                   |
| $\tau_{\text{res\_bou}\rightarrow\text{in}}$                                               | 0.43 ( $\pm$ 0.02)              | 654                   | 0.38 ( $\pm$ 0.02)             | 136                   |                   |
| $\tau_{\text{res\_in}}$                                                                    | 1.52 ( $\pm$ 0.11)              | 368                   | 1.15 ( $\pm$ 0.16)             | 31                    |                   |
| Ratio of residence times                                                                   |                                 |                       |                                |                       |                   |
|                                                                                            | CD3 $\epsilon$                  |                       | CD45                           |                       |                   |
| $\tau_{\text{res\_out}} / \tau_{\text{res\_in}}$                                           | 1.27 ( $\pm$ 0.10)              |                       | 1.03 ( $\pm$ 0.14)             |                       |                   |
| $\tau_{\text{res\_bou}\rightarrow\text{in}} / \tau_{\text{res\_bou}\rightarrow\text{out}}$ | 0.87 ( $\pm$ 0.07)              |                       | 0.60 ( $\pm$ 0.06)             |                       |                   |
| $N_{\text{res\_bou}\rightarrow\text{in}} / N_{\text{res\_bou}\rightarrow\text{out}}$       | 0.83                            |                       | 0.56                           |                       |                   |

Data, fitted value with  $\pm$  95% confidence interval.  $N_{\text{traj}}$  and  $N_{\text{subtraj}}$  indicate the number of trajectories and subtrajectories, respectively, from two cells.

<sup>a</sup> The relative occurrences of the shorter and longer lifetimes are  $\xi$  and  $1 - \xi$ , respectively.

<sup>b</sup>  $N_{\text{res\_in}}$ ,  $N_{\text{res\_bou}}$ , and  $N_{\text{res\_out}}$  are the number of data elements.

<sup>c</sup> The reason that  $N_{\text{subtraj}}$  of  $\tau_{\text{res\_bou}}$  is not the sum of  $N_{\text{subtraj}}$  of  $\tau_{\text{res\_bou}\rightarrow\text{out}}$  and that of  $\tau_{\text{res\_bou}\rightarrow\text{in}}$  is that both contain common subtrajectories that are terminated by the end of the trajectories rather than by exiting to the inside or outside.

**Table S3.** Diffusion coefficients of the slower and faster mobility states obtained by moving subtrajectory analysis using [Equations 2, 6, and 7](#) ([Fig. 5A and B](#))

|                         |                      | Slower                                     |                      | Faster                                     |                        | $N_{\text{subtraj}}$ |
|-------------------------|----------------------|--------------------------------------------|----------------------|--------------------------------------------|------------------------|----------------------|
|                         |                      | $D_{\text{slow}} (\mu\text{m}^2/\text{s})$ | $\xi^{\text{a}}$ (%) | $D_{\text{fast}} (\mu\text{m}^2/\text{s})$ | $1-\xi^{\text{a}}$ (%) |                      |
| Outside                 | Overall <sup>b</sup> | 0.0024<br>(+0.0006/-0.0004)                | 12<br>( $\pm 1$ )    | 0.095<br>( $\pm 0.002$ )                   | 88<br>( $\pm 1$ )      | 16,275               |
|                         | Directional          | 0.0013<br>( $\pm 0.0001$ )                 | 24<br>( $\pm 1$ )    | 0.070<br>( $\pm 0.001$ )                   | 76<br>( $\pm 1$ )      | 7,201                |
|                         | Free                 | 0.0069<br>( $\pm 0.0002$ )                 | 55<br>( $\pm 2$ )    | 0.078<br>( $\pm 0.003$ )                   | 45<br>( $\pm 2$ )      | 1,790                |
|                         | Confined             | -                                          | -                    | 0.115<br>( $\pm 0.002$ )                   | -                      | 7,284                |
| CD3 $\epsilon$ Boundary | Overall <sup>b</sup> | 0.009<br>(+0.043/-0.008)                   | 6<br>( $\pm 2$ )     | 0.094<br>( $\pm 0.002$ )                   | 94<br>( $\pm 2$ )      | 7,908                |
|                         | Directional          | 0.007<br>(+0.010/-0.004)                   | 9<br>( $\pm 2$ )     | 0.072<br>( $\pm 0.002$ )                   | 91<br>( $\pm 2$ )      | 3,685                |
|                         | Free                 | 0.008<br>( $\pm 0.001$ )                   | 52<br>( $\pm 2$ )    | 0.083<br>( $\pm 0.004$ )                   | 48<br>( $\pm 2$ )      | 819                  |
|                         | Confined             | -                                          | -                    | 0.118<br>( $\pm 0.003$ )                   | -                      | 3,404                |
| Inside                  | Overall <sup>b</sup> | 0.0025<br>(+0.0004/-0.0003)                | 50<br>( $\pm 3$ )    | 0.066<br>(+0.007/-0.006)                   | 50<br>( $\pm 3$ )      | 5,229                |
|                         | Directional          | 0.0014<br>( $\pm 0.0001$ )                 | 80<br>( $\pm 4$ )    | 0.044<br>(+0.009/-0.007)                   | 20<br>( $\pm 4$ )      | 2,795                |
|                         | Free                 | 0.0067<br>( $\pm 0.0001$ )                 | 91<br>( $\pm 2$ )    | 0.034<br>(+0.013/-0.010)                   | 9<br>( $\pm 2$ )       | 976                  |
|                         | Confined             | -                                          | -                    | 0.067<br>( $\pm 0.003$ )                   | -                      | 1,458                |
| Outside                 | Overall <sup>b</sup> | 0.0030<br>(+0.0004/-0.0003)                | 16<br>( $\pm 3$ )    | 0.225<br>( $\pm 0.007$ )                   | 84<br>( $\pm 3$ )      | 3,879                |
|                         | Directional          | 0.0026<br>( $\pm 0.0002$ )                 | 27<br>( $\pm 4$ )    | 0.171<br>( $\pm 0.006$ )                   | 73<br>( $\pm 4$ )      | 1,643                |
|                         | Free                 | 0.0041<br>( $\pm 0.0001$ )                 | 60<br>( $\pm 3$ )    | 0.201<br>(+0.015/-0.014)                   | 40<br>( $\pm 3$ )      | 342                  |
|                         | Confined             | -                                          | -                    | 0.287<br>( $\pm 0.009$ )                   | -                      | 1,894                |
| CD45 Boundary           | Overall <sup>b</sup> | 0.0059<br>(+0.0043/-0.0025)                | 5<br>( $\pm 3$ )     | 0.249<br>( $\pm 0.008$ )                   | 95<br>( $\pm 3$ )      | 2,560                |
|                         | Directional          | 0.0028<br>(+0.0009/-0.0007)                | 8<br>( $\pm 5$ )     | 0.185<br>(+0.007/-0.006)                   | 92<br>( $\pm 5$ )      | 1,084                |
|                         | Free                 | 0.0067<br>(+0.0008/-0.0007)                | 38<br>( $\pm 6$ )    | 0.225<br>(+0.022/-0.020)                   | 62<br>( $\pm 6$ )      | 249                  |
|                         | Confined             | -                                          | -                    | 0.349<br>(+0.017/-0.016)                   | -                      | 1,227                |
| Inside                  | Overall <sup>b</sup> | 0.0015<br>( $\pm 0.0002$ )                 | 54<br>( $\pm 5$ )    | 0.14<br>( $\pm 0.02$ )                     | 46<br>( $\pm 5$ )      | 469                  |
|                         | Directional          | 0.0013<br>( $\pm 0.0001$ )                 | 86<br>( $\pm 7$ )    | 0.08<br>(+0.04/-0.02)                      | 14<br>( $\pm 7$ )      | 246                  |
|                         | Free                 | 0.0047<br>( $\pm 0.0002$ )                 | 83<br>( $\pm 6$ )    | 0.11<br>( $\pm 0.03$ )                     | 17<br>( $\pm 6$ )      | 57                   |
|                         | Confined             | -                                          | -                    | 0.17<br>( $\pm 0.01$ )                     | -                      | 166                  |

Data, fitted value with  $\pm$  95% confidence interval.  $N_{\text{subtraj}}$  indicates the number of subtrajectories from two cells.

<sup>a</sup> The relative occurrences of the slower and faster diffusion states are  $\xi$  and  $1 - \xi$ , respectively.

<sup>b</sup> Overall distributions, which were the total of the three diffusion types, were used for fitting.



**Table S4.** Velocities of the directional diffusion  $v_{\text{direc}}$  and confinement radii  $r_{\text{conf}}$  obtained by moving subtrajectory analysis (Fig. 5C–F)

| The velocity of directional movement $v_{\text{direc}}$ (Equation 6) |          |                                        |                      |                                        |                        |                      |
|----------------------------------------------------------------------|----------|----------------------------------------|----------------------|----------------------------------------|------------------------|----------------------|
|                                                                      |          | Slower                                 |                      | Faster                                 |                        | $N_{\text{subtraj}}$ |
|                                                                      |          | $v_{\text{direc\_slow}} (\mu\text{m})$ | $\xi^{\text{a}}$ (%) | $v_{\text{direc\_fast}} (\mu\text{m})$ | $1-\xi^{\text{a}}$ (%) |                      |
| CD3 $\epsilon$                                                       | Outside  | 0.0264<br>(+0.0006/-0.0005)            | 34<br>( $\pm 1$ )    | 1.10<br>( $\pm 0.01$ )                 | 66<br>( $\pm 1$ )      | 7,284                |
|                                                                      | Boundary | 0.0295<br>(+0.0065/-0.0053)            | 11<br>( $\pm 4$ )    | 1.18<br>( $\pm 0.03$ )                 | 89<br>( $\pm 4$ )      | 3,685                |
|                                                                      | Inside   | 0.0263<br>(+0.0007/-0.0006)            | 84<br>( $\pm 2$ )    | 0.55<br>(+0.11/-0.09)                  | 16<br>( $\pm 2$ )      | 1,458                |
| CD45                                                                 | Outside  | 0.036<br>(+0.007/-0.006)               | 16<br>( $\pm 4$ )    | 1.80<br>( $\pm 0.07$ )                 | 84<br>( $\pm 4$ )      | 1,894                |
|                                                                      | Boundary | 0.038<br>(+0.020/-0.013)               | 4<br>( $\pm 3$ )     | 1.85<br>( $\pm 0.04$ )                 | 96<br>( $\pm 3$ )      | 1,227                |
|                                                                      | Inside   | 0.031<br>( $\pm 0.002$ )               | 78<br>( $\pm 7$ )    | 0.90<br>(+0.15/-0.13)                  | 22<br>( $\pm 7$ )      | 166                  |

  

| The confinement radius $r_{\text{conf}}$ (Equations 7 and 8) |  |                                 |                      |                                 |                      |                                 |                      |
|--------------------------------------------------------------|--|---------------------------------|----------------------|---------------------------------|----------------------|---------------------------------|----------------------|
|                                                              |  | Outside                         |                      | Boundary                        |                      | Inside                          |                      |
|                                                              |  | $r_{\text{conf}} (\mu\text{m})$ | $N_{\text{subtraj}}$ | $r_{\text{conf}} (\mu\text{m})$ | $N_{\text{subtraj}}$ | $r_{\text{conf}} (\mu\text{m})$ | $N_{\text{subtraj}}$ |
| CD3 $\epsilon$                                               |  | 0.187<br>( $\pm 0.002$ )        | 7,201                | 0.198<br>( $\pm 0.002$ )        | 3,404                | 0.114<br>( $\pm 0.005$ )        | 2,795                |
| CD45                                                         |  | 0.299<br>( $\pm 0.004$ )        | 1,646                | 0.346<br>( $\pm 0.005$ )        | 1,085                | 0.199<br>(+0.16/-0.15)          | 246                  |

Data, fitted value with  $\pm$  95% confidence interval.  $N_{\text{subtraj}}$  indicates the number of subtrajectories from two cells.

<sup>a</sup> The relative occurrences of the slower and faster diffusion states are  $\xi$  and  $1 - \xi$ , respectively.

**Table S5.** Association and dissociation rates of the transitions between the faster diffusion (dissociated) states and the slower diffusion (associated) states (Fig. 6)

| Association rates using Equations 12 and 13 |                                 |                      |                                 |                      |                      |
|---------------------------------------------|---------------------------------|----------------------|---------------------------------|----------------------|----------------------|
|                                             | CD3ε                            |                      | CD45                            |                      | $N_{\text{subtraj}}$ |
|                                             | $k_{\text{on}} (\text{s}^{-1})$ | $N_{\text{subtraj}}$ | $k_{\text{on}} (\text{s}^{-1})$ | $N_{\text{subtraj}}$ |                      |
| Overall <sup>b</sup>                        | 0.71 ( $\pm 0.02$ )             | 1,763                | 0.179 ( $\pm 0.007$ )           | 317 <sup>c</sup>     |                      |
| Outside                                     | 0.58 ( $\pm 0.02$ )             | 1,210                | 0.20 ( $\pm 0.03$ )             | 294                  |                      |
| Boundary                                    | 0.49 ( $\pm 0.14$ )             | 989                  | 0.95 ( $\pm 0.14$ )             | 268                  |                      |
| Inside                                      | 3.1 ( $\pm 0.2$ )               | 358                  | 2.7 ( $\pm 0.5$ )               | 27                   |                      |

  

| Dissociation rates using Equations 14 and 15 |                                        |                                          |                                        |                                        |                              |                  |
|----------------------------------------------|----------------------------------------|------------------------------------------|----------------------------------------|----------------------------------------|------------------------------|------------------|
|                                              | Slower                                 |                                          | Faster                                 |                                        | $N_{\text{subtraj}}$         |                  |
|                                              | $k_{\text{off\_slow}} (\text{s}^{-1})$ | $\nu^{\text{a}}$ (%)                     | $k_{\text{off\_fast}} (\text{s}^{-1})$ | $1-\nu^{\text{a}}$ (%)                 |                              |                  |
| CD3ε                                         | Overall <sup>b</sup>                   | 0.00 ( $\pm 0.04$ ) <sup>d,e</sup>       | 41 ( $\pm 1$ )                         | 10.8 ( $\pm 0.6$ )                     | 59 ( $\pm 1$ )               | 718 <sup>c</sup> |
|                                              | Outside                                | 0.0 ( $\pm 0.1$ ) <sup>d,e</sup>         | 43 ( $\pm 4$ )                         | 12 ( $\pm 2$ )                         | 57 ( $\pm 4$ )               | 370              |
|                                              | Boundary                               | 1.6 ( $\pm 1.0$ )                        | 50 ( $\pm 20$ )                        | 18 ( $\pm 8$ )                         | 50 ( $\pm 20$ )              | 180              |
|                                              | Inside                                 | 0.0 ( $\pm 0.1$ ) <sup>d,e</sup>         | 81 ( $\pm 3$ )                         | 45 ( $\pm 34$ )                        | 19 ( $\pm 3$ )               | 246              |
| CD45                                         | Overall <sup>b</sup>                   | 0.00 ( $\pm 0.09$ ) <sup>d,f</sup>       | 36 ( $\pm 4$ )                         | 61 ( $\pm 65$ )                        | 36 ( $\pm 4$ )               | 37 <sup>c</sup>  |
|                                              | Outside                                | 0.0 ( $\pm 0.7$ ) <sup>d,f</sup>         | 60 ( $\pm 10$ )                        | 88 ( $\pm 312$ )                       | 40 ( $\pm 10$ )              | 18               |
|                                              | Boundary                               | 0.0 ( $\pm 0.4$ ) <sup>d,f</sup>         | 70 ( $\pm 10$ )                        | 24 ( $\pm 15$ )                        | 30 ( $\pm 10$ )              | 17               |
|                                              | Inside                                 | 0 ( $\pm 1 \times 10^2$ ) <sup>d,f</sup> | 100 ( $\pm 100$ ) <sup>g</sup>         | 0 ( $\pm 2 \times 10^8$ ) <sup>h</sup> | 0 ( $\pm 100$ ) <sup>g</sup> | 9                |

Data, fitted value with  $\pm 95\%$  confidence interval.  $N_{\text{subtraj}}$  indicates the number of subtrajectories from two cells.

<sup>a</sup> The relative occurrences of the faster and slower transitions are  $\nu$  and  $1 - \nu$ , respectively.

<sup>b</sup> Overall data were obtained and analyzed without location classification.

<sup>c</sup> The reason why overall  $N_{\text{subtraj}}$  is not the sum of those on the outside, boundary, and inside is that they contain common subtrajectories that are terminated at the end of the trajectories or by exit to another region, not by association or dissociation.

<sup>d</sup> The rate  $k_{\text{off\_slow}}$  could not be determined by the fitting due to the large relative value of the standard deviation of the fit parameter. This means that  $k_{\text{off\_slow}}$  is much less than the inverse of the trajectory lifetime, which is involved in Equations 14 and 15.

<sup>e</sup> CD3ε:  $k_{\text{off\_slow}} \ll 1.09 \text{ s}^{-1}$ ,  $1/k_{\text{off\_slow}} \gg 0.91 \text{ s}$ .

<sup>f</sup> CD45:  $k_{\text{off\_slow}} \ll 0.31 \text{ s}^{-1}$ ,  $1/k_{\text{off\_slow}} \gg 3.2 \text{ s}$ .

<sup>g</sup> The large error for CD45 was caused by the small number of subtrajectories; as judged by the decay curve, the slower fraction is in a great majority.

<sup>h</sup> The rate could not be determined due to the small fraction of the small number  $N_{\text{subtraj}}$ .
